# Supplementary material
Source: PubMed Central journal article supplement (PMC4784856)
Supplement: guac029028.w4_default.pdf [file guac029028.w4_default.pdf]

## Appendix 4. Sensitivity Analyses

### 1. Restricting the samples to the White population only:

Table A4.1 - Regression analysis of the association between oral health and SEP, England and the US, White population

| Oral health outcome and SEP level    | Education          |                   | Income             |                   |
|--------------------------------------|--------------------|-------------------|--------------------|-------------------|
|                                      | England            | US                | England            | US                |
|                                      | PR or IRR (95% CI) |                   | PR or IRR (95% CI) |                   |
| Number of missing teeth <sup>a</sup> |                    |                   |                    |                   |
| High (Ref)                           | 1.00               | 1.00              | 1.00               | 1.00              |
| Medium                               | 1.26 (1.19, 1.33)  | 1.40 (1.29, 1.52) | 1.18 (1.11, 1.24)  | 1.19 (1.12, 1.27) |
| Low                                  | 1.52 (1.43, 1.63)  | 1.93 (1.76, 2.12) | 1.39 (1.31, 1.47)  | 1.49 (1.40, 1.59) |
| <i>p</i> -value for trend            | <0.001             | <0.001            | <0.001             | <0.001            |
| Self-rated oral health <sup>b</sup>  |                    |                   |                    |                   |
| High (Ref)                           | 1.00               | 1.00              | 1.00               | 1.00              |
| Medium                               | 1.35 (1.21, 1.52)  | 2.34 (1.94, 2.81) | 1.25 (1.12, 1.40)  | 1.52 (1.31, 1.77) |
| Low                                  | 1.60 (1.41, 1.81)  | 3.42 (2.84, 4.13) | 1.47 (1.32, 1.63)  | 2.25 (1.86, 2.72) |
| <i>p</i> -value for trend            | <0.001             | <0.001            | <0.001             | <0.001            |
| Oral impacts <sup>b</sup>            |                    |                   |                    |                   |
| High (Ref)                           | 1.00               | 1.00              | 1.00               | 1.00              |
| Medium                               | 1.69 (1.42, 2.01)  | 1.72 (1.38, 2.15) | 1.33 (1.08, 1.64)  | 1.92 (1.52, 2.44) |
| Low                                  | 2.15 (1.74, 2.65)  | 2.96 (2.15, 4.07) | 1.83 (1.54, 2.19)  | 2.81 (2.14, 3.69) |
| <i>p</i> -value for trend            | <0.001             | <0.001            | <0.001             | <0.001            |

<sup>a</sup> Estimates reported are incidence rate ratios (IRRs).

<sup>b</sup> Estimates reported are prevalence ratios (PRs).

Table A4.2 – Relative socioeconomic inequalities in oral health measures, England and the US - White population

|                         | Education         |                   | Income            |                   |
|-------------------------|-------------------|-------------------|-------------------|-------------------|
|                         | England           | US                | England           | US                |
|                         | RII (95% CI)      |                   | RII (95% CI)      |                   |
| Number of missing teeth | 1.71 (1.57, 1.87) | 2.32 (2.05, 2.62) | 1.67 (1.52, 1.83) | 1.88 (1.71, 2.07) |
| Self-rated oral health  | 1.83 (1.57, 2.14) | 4.64 (3.82, 5.64) | 1.80 (1.53, 2.13) | 3.56 (2.67, 4.74) |
| Oral impacts            | 2.62 (2.04, 3.37) | 4.04 (2.67, 6.11) | 2.60 (1.98, 3.41) | 4.82 (3.23, 7.17) |

RII: Relative Index of Inequality

Table A4.3 – Absolute socioeconomic inequalities in oral health measures, England and the US - White population

|                         | Education            |                      | Income               |                      |
|-------------------------|----------------------|----------------------|----------------------|----------------------|
|                         | England              | US                   | England              | US                   |
|                         | SII (95% CI)         |                      | SII (95% CI)         |                      |
| Number of missing teeth | 4.16 (3.49, 4.84)    | 6.05 (4.98, 7.12)    | 3.51 (2.86, 4.16)    | 4.86 (3.98, 5.75)    |
| Self-rated oral health  | 18.23 (13.49, 22.98) | 40.23 (34.63, 45.83) | 18.59 (13.38, 23.81) | 34.95 (26.39, 43.51) |
| Oral impacts            | 13.67 (10.12, 17.21) | 16.96 (11.88, 22.05) | 14.97 (11.14, 18.80) | 20.32 (14.70, 25.93) |

SII: Slope Index of Inequality

2. Estimates of inequalities in self-rated oral health and oral impacts (the two subjective outcomes), restricting the sample to dentate participants.

Table A4.4 - Regression analysis of the association between subjective oral health measures and SEP level, England and the US - Dentate participants

| Oral health outcome and SEP level | Education         |                   | Income            |                   |
|-----------------------------------|-------------------|-------------------|-------------------|-------------------|
|                                   | England           | US                | England           | US                |
|                                   | PR (95% CI)       |                   |                   |                   |
| Self-rated oral health            |                   |                   |                   |                   |
| High (Ref)                        | 1.00              | 1.00              | 1.00              | 1.00              |
| Medium                            | 1.37 (1.23, 1.52) | 2.13 (1.82, 2.49) | 1.25 (1.11, 1.40) | 1.46 (1.30, 1.64) |
| Low                               | 1.63 (1.46, 1.82) | 3.06 (2.64, 3.54) | 1.52 (1.37, 1.70) | 2.04 (1.78, 2.33) |
| <i>P</i> for trend                | <0.001            | <0.001            | <0.001            | <0.001            |
| Oral impacts                      |                   |                   |                   |                   |
| High (Ref)                        | 1.00              | 1.00              | 1.00              | 1.00              |
| Medium                            | 1.72 (1.48, 2.01) | 1.83 (1.50, 2.23) | 1.37 (1.11, 1.68) | 1.80 (1.37, 2.37) |
| Low                               | 2.11 (1.72, 2.59) | 2.78 (2.22, 3.49) | 1.88 (1.57, 2.25) | 2.69 (2.09, 3.46) |
| <i>P</i> for trend                | <0.001            | <0.001            | <0.001            | <0.001            |

All models are weighted and adjusted for age, gender, ethnicity, and marital status. Estimates reported are prevalence ratios (PRs).

Table A4.5 - Relative and absolute inequalities in self-rated oral health and oral impacts, England and the US - Dentate participants

|              | Education              |                      | Income                 |                      |
|--------------|------------------------|----------------------|------------------------|----------------------|
|              | Self-rated oral health | Oral impacts         | Self-rated oral health | Oral impacts         |
| RII (95% CI) |                        |                      |                        |                      |
| England      | 1.90 (1.65, 2.19)      | 2.63 (2.06, 3.36)    | 1.93 (1.63, 2.27)      | 2.67 (2.03, 3.53)    |
| US           | 3.95 (3.44, 4.54)      | 3.74 (2.83, 4.95)    | 3.03 (2.47, 3.71)      | 4.52 (3.21, 6.36)    |
| SII (95% CI) |                        |                      |                        |                      |
| England      | 19.80 (15.29, 24.31)   | 14.37 (10.82, 17.93) | 20.25 (14.96, 25.53)   | 15.24 (11.16, 19.31) |
| US           | 44.91 (39.80, 50.02)   | 17.82 (14.28, 21.37) | 35.13 (28.39, 41.86)   | 20.32 (15.31, 25.32) |

RII: Relative Index of Inequality, SII: Slope Index of Inequality

### 3. Estimates using imputed income data in England

Table A4.6 - Regression analysis of the association between income and oral health, England and the US

| Oral health outcome and income level                 | Household income   |                   |
|------------------------------------------------------|--------------------|-------------------|
|                                                      | England            | US                |
|                                                      | PR or IRR (95% CI) |                   |
| Number of missing teeth <sup>a</sup>                 |                    |                   |
| High (Ref)                                           | 1.00               | 1.00              |
| Medium                                               | 1.18 (1.11, 1.24)  | 1.14 (1.08, 1.21) |
| Low                                                  | 1.33 (1.24, 1.43)  | 1.33 (1.24, 1.42) |
| <i>P</i> for trend                                   | <0.001             | <0.001            |
| Self-rated oral health (less than good) <sup>b</sup> |                    |                   |
| High (Ref)                                           | 1.00               | 1.00              |
| Medium                                               | 1.27 (1.15, 1.42)  | 1.51 (1.36, 1.67) |
| Low                                                  | 1.49 (1.35, 1.65)  | 2.00 (1.78, 2.25) |
| <i>P</i> for trend                                   | <0.001             | <0.001            |
| Reporting ≥1 Oral impact <sup>b</sup>                |                    |                   |
| High (Ref)                                           | 1.00               | 1.00              |
| Medium                                               | 1.38 (1.15, 1.65)  | 1.78 (1.41, 2.23) |
| Low                                                  | 1.95 (1.64, 2.32)  | 2.49 (1.96, 3.17) |
| <i>P</i> for trend                                   | <0.001             | <0.001            |

All models are weighted and adjusted for age, gender, ethnicity, and marital status.

<sup>a</sup> Estimates reported are incidence rate ratios (IRRs).

<sup>b</sup> Estimates reported are prevalence ratios (PRs).

Table A4.7 - Relative and absolute income-related inequalities in oral health, England and the US

|              | Number of missing teeth | Self-rated oral health | Oral impacts         |
|--------------|-------------------------|------------------------|----------------------|
| RII (95% CI) |                         |                        |                      |
| England      | 1.56 (1.41, 1.73)       | 1.81 (1.56, 2.12)      | 2.72 (2.10, 3.52)    |
| US           | 1.60 (1.44, 1.78)       | 2.88 (2.43, 3.42)      | 3.97 (2.85, 5.52)    |
| SII (95% CI) |                         |                        |                      |
| England      | 2.92 (2.24, 3.60)       | 18.38 (13.41, 23.36)   | 15.84 (11.89, 19.79) |
| US           | 3.61 (2.77, 4.44)       | 33.57 (27.88, 39.26)   | 18.76 (14.14, 23.41) |

RII: Relative Index of Inequality, SII: Slope Index of Inequality
